# Supplementary material
Source: PubMed Central journal article supplement (PMC4939621)
Supplement: NIHMS755660-supplement-Supplemental_Information.pdf [file NIHMS755660-supplement-Supplemental_Information.pdf]

**Supporting Information for**

**Investigating Therapeutic Protein Structure with Diethylpyrocarbonate  
Labeling and Mass Spectrometry**

Nicholas B. Borotto,<sup>1</sup> Yuping Zhou,<sup>1,†</sup> Stephen R. Hollingsworth,<sup>2</sup> John E. Hale,<sup>3</sup> Eric M. Graban,<sup>3</sup>  
Robert C. Vaughan,<sup>2\*</sup> and Richard W. Vachet<sup>1\*</sup>

<sup>1</sup>Department of Chemistry, University of Massachusetts, Amherst, MA 01003, USA

<sup>2</sup>Department of Molecular and Cellular Biochemistry, Indiana University, Bloomington, IN  
47405, USA

<sup>3</sup>QuarryBio, Bloomington, IN 47404, USA

<sup>†</sup>Current address: Eli Lilly, Indianapolis, IN 46285, USA

## Supplemental Methods

### Proteolytic Digestion

Since  $\beta$ 2m and HGH have a single disulfide bond, TCEP (protein:TCEP=1:40 molar ratio) was added to reduce the disulfide bond and iodoacetamide (100  $\mu$ M) was added simultaneously at room temperature for 30 min in the dark to alkylate the reduced Cys residues. The resulting samples were incubated with 10% (vol/vol) acetonitrile at 50 °C for 45 min prior to digestion with immobilized chymotrypsin (enzyme/substrate ratio of 1:10) for  $\beta$ 2m and immobilized trypsin (1:10) for HGH at 37 °C. After 2 hours, the reaction mixture was centrifuged for 2 min at 9000 relative centrifugal force (RCF) to separate the enzyme from the protein. After that, the samples were either immediately analyzed by LC/MS or flash frozen in liquid nitrogen and stored at -80°C until LC/MS analysis.

To achieve complete digestion of IgG1, an initial digestion with activated papain was necessary. To activate papain 0.5  $\mu$ M of the enzyme was incubated in 1 mM EDTA and 10 mM L-cysteine at 37 °C for 30 min. Once complete the cysteine concentration was reduced to less than 2  $\mu$ M via four spins with a 3000 MWCO filter. The papain digestion was then performed for 2.5 h using a 1:100 (papain:IgG1) ratio. IgG1 was then denatured and its disulfide bonds were reduced in a 50 mM phosphate buffered solution at pH 7.4 with 1 M urea and 20 mM DTT at 60 °C for 20 min. The reduced disulfides were then alkylated with 40 mM iodoacetamide for 2 min. Immobilized trypsin was then added to achieve a 1:3 (enzyme:substrate) ratio, and the digestion reaction was allowed to proceed overnight at room temperature. After digestion, the samples were spun at 9200 RCF for 5 min, and the supernatant was collected, flash-frozen in liquid nitrogen, and stored at -80 °C until analysis via LC/MS.

### HPLC Separation

$\beta$ 2m HPLC separations were conducted using an HP1100 HPLC system (Agilent, Wilmington, DE) with a Discovery C18 column (15 cm  $\times$  2.1 mm, 5  $\mu$ m particle size; Supelco, St. Louis, MO, USA). Peptide fragments from the proteolytic digests were eluted using a linear gradient of methanol containing 0.1% acetic acid that increased from 10% to 100% methanol over 30 min at a flow rate of 0.25 mL/min.

HPLC separations of IgG were performed using a Thermo Scientific Acclaim PepMap RSLC C18 (15 cm  $\times$  50  $\mu$ m, 2  $\mu$ m particle size) on an Easy-nLC 1000 system (Thermo Scientific, Tewksbury, MA). To achieve sufficient separation of the proteolytic peptides, a shallow gradient was used where %B (0.1% formic acid in acetonitrile) was increased from 0 to 40% over 90 min. The column was then flushed by jumping to 95 % B over 15 min. It was then held at 95% B for the remainder of the separation (i.e. another 20 min). A flow rate of 0.225  $\mu$ L/min was used.

HPLC analyses of HGH were performed using an Accela LC system (Thermo Scientific, Tewksbury, MA) with a ZORBAX 300SB-C18 MicroBore RR column (1.0  $\times$  150 mm, 3.5  $\mu$ m particle size, Agilent, Wilmington, DE). Peptides were eluted over a 50-minute gradient where %B was increased from 2% to 45% over the first 35 minutes, then elevated to 80% for an additional 5 minutes. The column was then re-equilibrated with 0% B for 10 minutes. Blank runs were run in between each sample, and were each run at a flow rate of .05 mL/min.

### Circular Dichroism

All IgG solutions were diluted to 0.75  $\mu$ M in 50 mM phosphate buffer at pH 7.4 prior to analysis. For HGH conditions all solutions were diluted to 5  $\mu$ M in 10 mM phosphate buffer at pH 8.0. Circular dichroism was measured using a J-715 spectropolarimeter (Jasco, Easton, MD). The scan ranged from 250 to 195 nm with a scan resolution of 0.5 nm, a scan rate of 100 nm/min, and a response time of 1 sec. Raw data were converted into mean residue ellipticity using the CD Analysis & Plotting Tool (CAPITO).<sup>45</sup>

### **Fluorescence**

The concentration of IgG was diluted to 0.75  $\mu\text{M}$  in 50 mM phosphate buffer at pH 7.4 prior to analysis. For HGH, the protein was diluted to 5  $\mu\text{M}$  in 10 mM phosphate buffer at pH 8.0. A Photon Technology International Quantamaster-4SE (PTI, Edison, NJ) was used to obtain fluorescence spectra for IgG. Tryptophan fluorescence was collected using an excitation wavelength of 295 nm and slit widths of 1 nm. Emission scans ranged from 310-440 nm. A Synergy H1 multi-mode plate reader (BioTek, Winooski, VT) was used to measure the fluorescence of HGH. Samples were excited at 295 nm and emissions were monitored from 300-440 nm.

### **Dynamic Light Scattering**

A Zetasizer Nano-ZS (Malvern Instruments, Worcestershire, U.K.) was used to measure the hydrodynamic radii of native and heat denatured IgG. A 1 mL solution of 1  $\mu\text{M}$  IgG was used for these experiments. Five runs were conducted for each sample, and volume particle size distribution is reported. For HGH the measurements were carried out using a Zetasizer Nano-S (Malvern Instruments, Worcestershire, U.K.). HGH was measured at 5  $\mu\text{M}$  after treatment by the conditions indicated. Measurement duration was according to preset levels, and intensity/volume distributions of the samples from at least four runs were recorded in each dataset.

### **Size Exclusion Chromatography**

For SEC experiments, the protein was separated using a SuperSW2000 30 cm  $\times$  4.6 mm column (GE Healthcare Biosciences, Piscataway, NJ) installed on an Agilent HP1100 series HPLC system (Wilmington, DE). Before injection of the sample, the SEC column was first equilibrated with a 20 mM ammonium acetate mobile phase (pH = 7.4) at a 0.035 mL/min flow rate for 1 h. 20  $\mu\text{L}$  of the protein sample was injected into the sample loop. A variable wavelength detector set at 214 nm was used for detection.

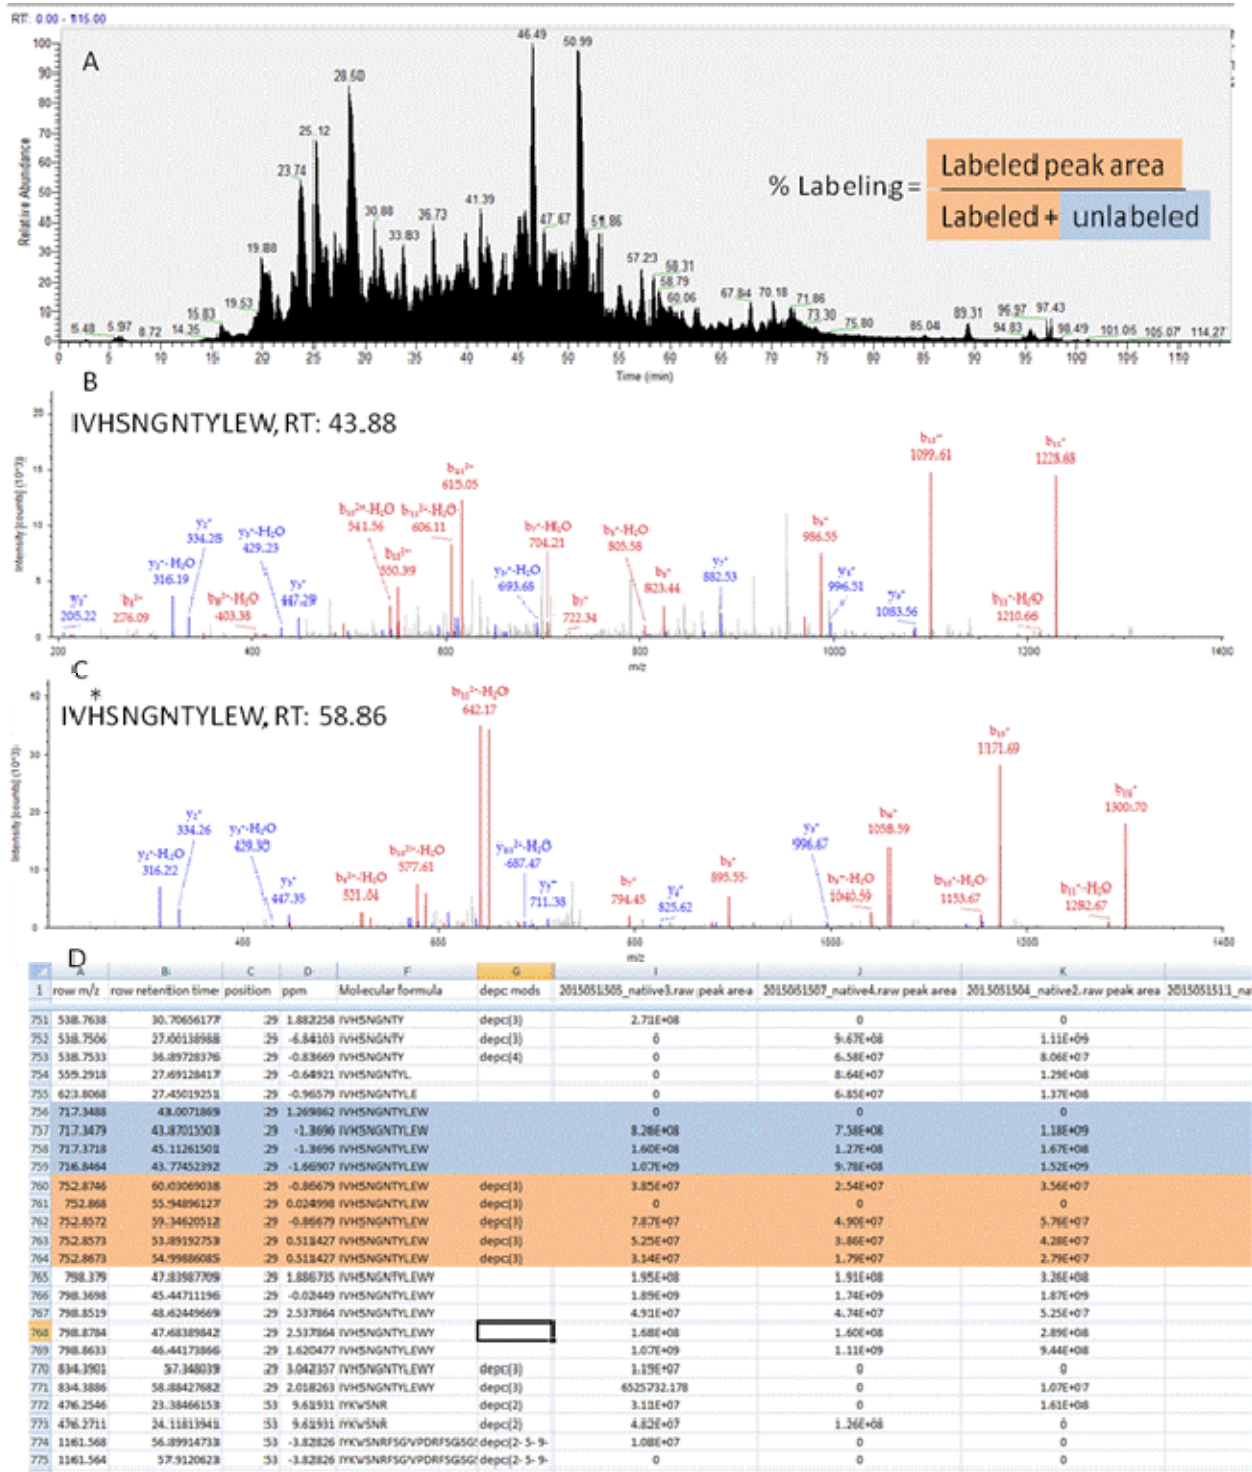

Figure S1: Illustration of the process by which the labeling percent is calculated. (A): HPLC/MS analysis of the digested protein is carried out. All peptides are subjected to MS/MS for identification, and unlabeled (B) and labeled peptides (C) are identified. For peptide identification, SearchGUI takes the raw MS/MS data (e.g. spectra in B and C) and uses five different search engines to compare the data against a database constructed using cRAP. The data from the identified peptides is then used to construct a custom database for peak identification in the program MZmine. MZmine is then used to calculate peak

area for each identified peptide. This peak area information along with peptide identity, m/z ratio, retention time, and mass accuracy is exported into a spreadsheet format for calculation of DEPC labeling percentages (D). Using the exported peak areas, peptide identities, and the % labeling equation shown in A, the percent modification for each peptide can be calculated. All identified peptides containing the residue of interest are used in the calculation.

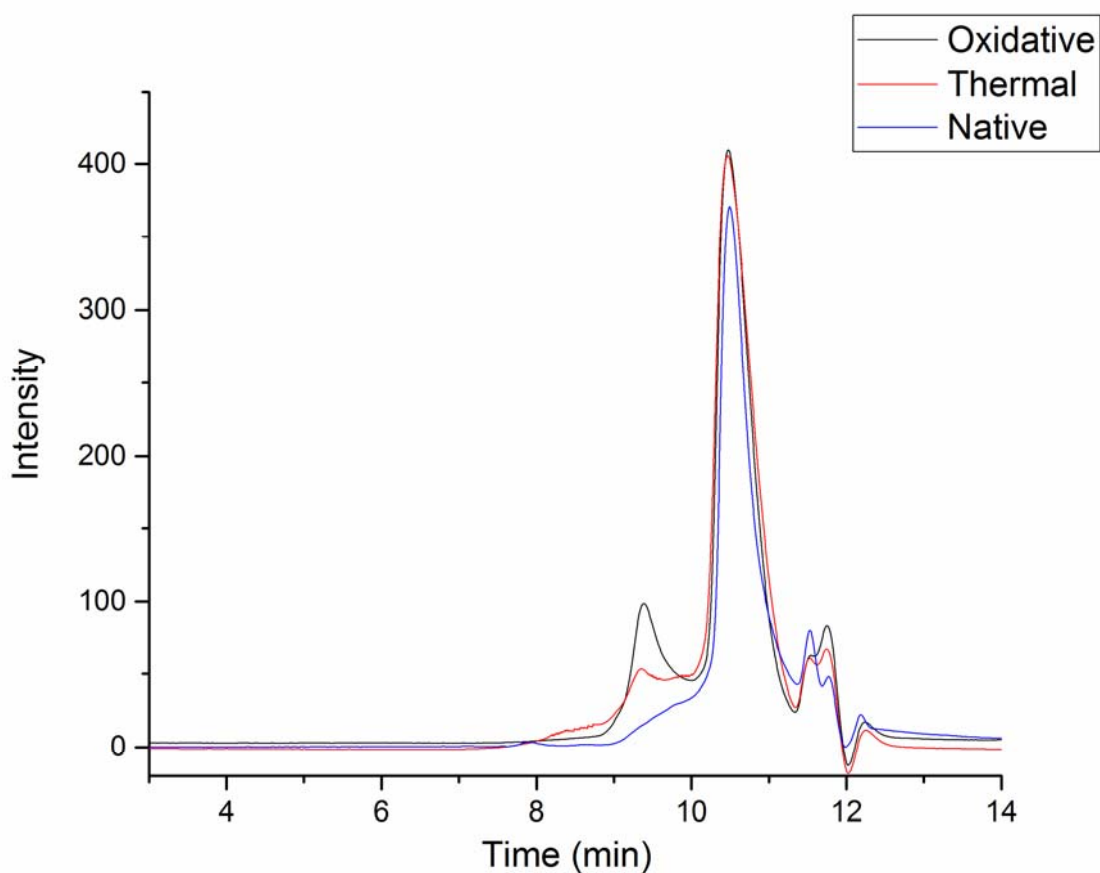

**Figure S2:** Size exclusion chromatography of  $\beta 2m$  before (blue) and after heating (red) and oxidation (black). Both chromatograms demonstrate the presence of aggregated species. These aggregated complexes are evident from the peaks eluting earlier than 10.5 min.

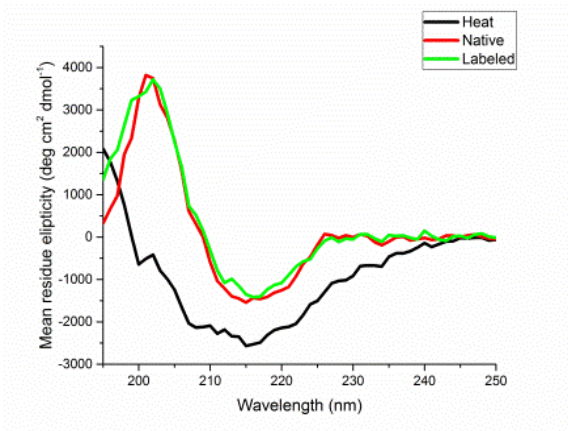

**Figure S3:** Circular dichroism of IgG1 under normal (red), heated (Black), and DEPC-labeled (green) conditions. The essentially identical overlap between the CD spectra of the normal and DEPC-labeled samples demonstrates that DEPC labeling has little effect on the secondary structure of IgG1.

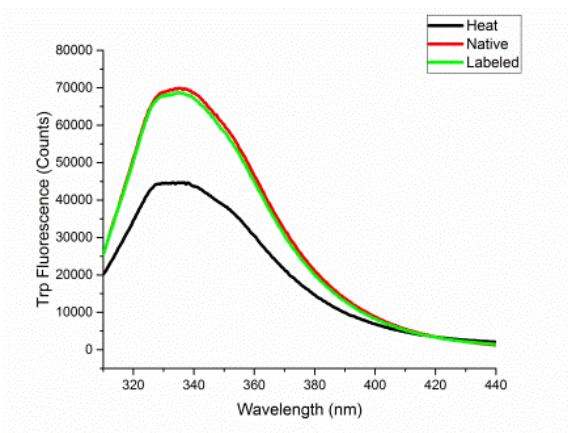

**Figure S4:** Tryptophan fluorescence of IgG1 under normal (red), heated (Black), and DEPC-labeled (green) conditions. The essentially identical overlap between the spectra of the normal and DEPC-labeled samples demonstrates that covalent labeling has little effect on the structure of IgG1.

**Table S1:** Modification percentages for individual residues of IgG's light chain before and after heating at 75 °C for 15 minutes.

| LC     | Native        | 15 min @<br>75°C | Significant* | LC     | Native        | 15 min @<br>75°C | Significant* |
|--------|---------------|------------------|--------------|--------|---------------|------------------|--------------|
| Thr5   | 6% ± 3%       | 0.0% ± 0.0%      | yes          | Ser127 | 3.7% ± 0.7%   | 0.4% ± 0.3%      | yes          |
| Thr7   | 51% ± 7%      | 14% ± 10%        | yes          | Thr131 | 2.4% ± 0.1%   | 1.0% ± 0.4%      | yes          |
| Ser10  | 21% ± 3%      | 0.0% ± 0.0%      | yes          | Ser132 | 2.3% ± 0.2%   | 0.3% ± 0.2%      | yes          |
| Ser14  | 15% ± 4%      | 2% ± 1%          | yes          | Ser136 | 0.0% ± 0.0%   | 14% ± 3%         | no           |
| Ser20  | 1.5% ± 0.3%   | 0.9% ± 0.2%      | yes          | Tyr145 | 8.1% ± 0.9%   | 2% ± 2%          | yes          |
| Ser22  | 1.3% ± 0.3%   | 0.3% ± 0.1%      | yes          | Lys147 | 0.0% ± 0.0%   | 30% ± 6%         | no           |
| Ser25  | 9% ± 2%       | 0.0% ± 0.0%      | yes          | Lys152 | 11% ± 1%      | 7% ± 2%          | yes          |
| Ser26  | 8% ± 1%       | 1.0% ± 0.3%      | yes          | Lys154 | 1.5% ± 0.4%   | 38% ± 5%         | yes          |
| Tyr28  | 22% ± 3%      | 10% ± 2%         | yes          | Ser158 | 28% ± 4%      | 1.8% ± 1.0%      | yes          |
| His31  | 14% ± 13%     | 13% ± 3%         | no           | Ser167 | 4% ± 1%       | 21% ± 16%        | yes          |
| Ser32  | 2.4% ± 0.8%   | 0.6% ± 0.2%      | yes          | Thr169 | 0.6% ± 0.2%   | 18% ± 16%        | yes          |
| Thr36  | 11% ± 4%      | 8.3% ± 5%        | no           | Ser173 | 1.8% ± 0.2%   | 1.5% ± 0.2%      | yes          |
| Tyr37  | 11% ± 4%      | 0.9% ± 0.6%      | yes          | Lys174 | 1.1% ± 0.2%   | 5% ± 1%          | yes          |
| Tyr41  | 11% ± 3%      | 3.6% ± 0.7%      | yes          | Ser176 | 13% ± 2%      | 23% ± 5%         | yes          |
| Lys44  | 46% ± 4%      | 19% ± 4%         | yes          | Thr177 | 6% ± 2%       | 19% ± 4%         | yes          |
| Ser48  | 10% ± 3%      | 9% ± 1%          | no           | Tyr178 | 12% ± 1%      | 8% ± 4%          | no           |
| Lys50  | 2.5% ± 0.5%   | 73% ± 4%         | yes          | Ser179 | 7% ± 2%       | 20% ± 6%         | yes          |
| Tyr54  | 90% ± 6%      | 0.0% ± 0.0%      | yes          | Ser181 | 6% ± 2%       | 29% ± 10%        | yes          |
| Lys55  | 0.0% ± 0.0%   | 0.0% ± 0.0%      | no           | Ser182 | 0.8% ± 0.1%   | 4% ± 1%          | yes          |
| Ser57  | 9% ± 5%       | 0.0% ± 0.0%      | yes          | Thr183 | 9% ± 2%       | 3% ± 1%          | yes          |
| Ser61  | 4% ± 3%       | 1% ± 1%          | no           | Thr185 | 9% ± 2%       | 1.7% ± 0.8%      | yes          |
| Ser68  | 18% ± 4%      | 0.0% ± 0.0%      | yes          | Thr187 | 0.34% ± 0.09% | 0.8% ± 0.9%      | no           |
| Ser70  | 6% ± 3%       | 1.1% ± 0.8%      | yes          | Lys188 | 0.0% ± 0.0%   | 6% ± 5%          | no           |
| Ser72  | 0.3% ± 0.2%   | 0.2% ± 0.1%      | no           | Tyr191 | 63% ± 9%      | 88% ± 4%         | yes          |
| Thr74  | 0.09% ± 0.09% | 4% ± 1%          | yes          | His194 | 39% ± 5%      | 0.4% ± 0.4%      | yes          |
| Thr77  | 11% ± 5%      | 4.3% ± 0.8%      | yes          | Ser196 | 32% ± 3%      | 89% ± 3%         | yes          |
| Lys79  | 0.0% ± 0.0%   | 24% ± 2%         | no           | Tyr197 | 0.12% ± 0.07% | 8% ± 5%          | yes          |
| Ser81  | 0.0% ± 0.0%   | 29% ± 7%         | no           | Thr198 | 50% ± 9%      | 34% ± 2%         | yes          |
| Tyr91  | 6% ± 3%       | 1.7% ± 0.3%      | yes          | Thr202 | 43% ± 11%     | 1.9% ± 0.5%      | yes          |
| Tyr92  | 5% ± 3%       | 0.0% ± 0.0%      | yes          | His203 | 0.64% ± 0.33% | 31% ± 5%         | yes          |
| Ser97  | 2.6% ± 0.9%   | 14% ± 3%         | yes          | Lys204 | 44% ± 7%      | 39% ± 6%         | no           |
| His98  | 3.2% ± 1.0%   | 5% ± 3%          | no           | Thr205 | 1.2% ± 0.6%   | 66% ± 4%         | yes          |
| Thr102 | 0.21% ± 0.05% | 1.1% ± 0.1%      | yes          | Ser206 | 2% ± 1%       | 12% ± 4%         | yes          |
| Thr107 | 33% ± 28%     | 0.0% ± 0.0%      | yes          | Thr207 | 1.9% ± 0.9%   | 0.3% ± 0.3%      | yes          |
| Lys108 | 77% ± 3%      | 82% ± 2%         | no           | Ser208 | 10% ± 4%      | 71% ± 15%        | yes          |
| Thr119 | 76% ± 9%      | 0.0% ± 0.0%      | yes          | Lys212 | 16% ± 5%      | 45% ± 12%        | yes          |
| Ser121 | 70% ± 11%     | 4.0% ± 0.9%      | yes          | Ser213 | 15.3% ± 3%    | 73% ± 35%        | no           |
| Ser126 | 3.8% ± 0.9%   | 0.0% ± 0.0%      | yes          |        |               |                  |              |

\*A difference was considered significant if the p-value, calculated by performing an unpaired T-test, was less than 0.05 (corresponding to a 95% confidence level, n=5).

**Table S2:** Modification percentages for individual residues of IgG's heavy chain before and after heating at 75 °C for 15 minutes.

| HC     | Native      | 15 min @<br>75°C | Significant* | HC     | Native      | 15 min @<br>75°C | Significant* | HC     | Native        | 15 min @<br>75°C | Significant* |
|--------|-------------|------------------|--------------|--------|-------------|------------------|--------------|--------|---------------|------------------|--------------|
| Lys5   | 0.0% ± 0.0% | 0.0% ± 0.0%      | no           | Tyr150 | 16% ± 7%    | 3% ± 2%          | yes          | Ser293 | 43% ± 3%      | 9% ± 2%          | yes          |
| Ser7   | 3% ± 2%     | 0.0% ± 0.0%      | yes          | Thr156 | 35% ± 9%    | 0.0% ± 0.0%      | yes          | Thr294 | 28% ± 13%     | 60% ± 16%        | yes          |
| Ser15  | 1.2% ± 0.5% | 46% ± 7%         | yes          | Thr158 | 23% ± 8%    | 0.0% ± 0.0%      | yes          | Ser297 | 5% ± 2%       | 1% ± 1%          | yes          |
| Ser17  | 1.1% ± 0.4% | 52% ± 7%         | yes          | Ser161 | 1% ± 1%     | 7.0% ± 0.8%      | yes          | Ser299 | 6% ± 4%       | 0.2% ± 0.2%      | yes          |
| Ser19  | 2.0% ± 0.8% | 0.0% ± 0.0%      | yes          | Ser163 | 2.8% ± 0.6% | 0.0% ± 0.0%      | yes          | His305 | 5% ± 2%       | 10% ± 1%         | yes          |
| Thr21  | 1.2% ± 0.5% | 3.0% ± 0.4%      | yes          | Ser165 | 2.9% ± 0.5% | 7% ± 3%          | yes          | Lys312 | 4.2% ± 0.6%   | 56% ± 2%         | yes          |
| Thr23  | 13% ± 4%    | 0.0% ± 0.0%      | yes          | Ser166 | 0.2% ± 0.0% | 1.2% ± 0.6%      | yes          | Lys315 | 31% ± 7%      | 3.0% ± 0.5%      | yes          |
| Ser25  | 1.5% ± 1.2% | 0.0% ± 0.0%      | yes          | His169 | 0.7% ± 0.2% | 3% ± 1%          | yes          | Ser320 | 2.1% ± 0.6%   | 0.0% ± 0.0%      | yes          |
| Ser28  | 12% ± 4%    | 1.2% ± 0.7%      | yes          | Thr170 | 0.8% ± 0.2% | 3.1% ± 0.6%      | yes          | Lys329 | 1.5% ± 0.7%   | 38% ± 4%         | yes          |
| Tyr32  | 13% ± 1%    | 22% ± 1%         | yes          | Ser177 | 49% ± 6%    | 49% ± 14%        | no           | Thr330 | 67% ± 10%     | 8.5% ± 0.6%      | yes          |
| Ser56  | 10% ± 3%    | 15% ± 4%         | no           | Tyr180 | 29% ± 4%    | 59% ± 17%        | yes          | Ser332 | 18% ± 7%      | 0.0% ± 0.0%      | yes          |
| Thr57  | 24% ± 6%    | 2% ± 1%          | yes          | Thr181 | 1.0% ± 0.1% | 51% ± 21%        | yes          | Lys333 | 0.0% ± 0.0%   | 9% ± 5%          | no           |
| Tyr59  | 1.3% ± 0.5% | 19% ± 2%         | yes          | Ser183 | 12% ± 4%    | 4% ± 3%          | no           | Thr334 | 12% ± 4%      | 24% ± 1%         | yes          |
| Ser61  | 7% ± 1%     | 0.0% ± 0.0%      | yes          | Ser184 | 7% ± 1%     | 3% ± 3%          | yes          | Lys335 | 28% ± 16%     | 6% ± 5%          | yes          |
| Lys64  | 1.0% ± 0.6% | 17.9% ± 2.0%     | yes          | Ser185 | 22% ± 5%    | 2% ± 2%          | yes          | Lys339 | 3% ± 3%       | 26% ± 7%         | yes          |
| Ser65  | 5% ± 3%     | 0.8% ± 0.7%      | yes          | Thr187 | 0.6% ± 0.3% | 9% ± 5%          | yes          | Tyr344 | 27% ± 4%      | 1.0% ± 0.5%      | yes          |
| Ser68  | 59% ± 6%    | 0.0% ± 0.0%      | yes          | Ser190 | 1.4% ± 0.4% | 7% ± 3%          | yes          | Thr345 | 0.0% ± 0.0%   | 0.6% ± 0.1%      | no           |
| Thr70  | 44% ± 10%   | 14% ± 1%         | yes          | Ser191 | 16% ± 1%    | 2.9% ± 0.7%      | yes          | Lys350 | 76% ± 2%      | 27% ± 4%         | yes          |
| Lys71  | 13% ± 6%    | 68% ± 4%         | yes          | Thr192 | 0.6% ± 0.4% | 6% ± 6%          | no           | Lys355 | 50% ± 5%      | 74% ± 3%         | yes          |
| Ser74  | 59% ± 3%    | 11% ± 3%         | yes          | Ser195 | 0.8% ± 0.4% | 2.8% ± 0.6%      | yes          | Lys357 | 18% ± 1%      | 6.2% ± 0.8%      | yes          |
| Lys75  | 3% ± 2%     | 32% ± 5%         | yes          | Thr197 | 0.6% ± 0.5% | 3% ± 1%          | yes          | Ser359 | 22% ± 6%      | 45% ± 24%        | no           |
| Ser76  | 10% ± 5%    | 0.0% ± 0.0%      | yes          | Thr199 | 11% ± 1%    | 0.3% ± 0.4%      | yes          | Thr361 | 6% ± 3%       | 3% ± 1%          | yes          |
| Lys81  | 15% ± 2%    | 51% ± 12%        | yes          | His204 | 20% ± 2%    | 42% ± 6%         | yes          | Thr365 | 1.3% ± 0.4%   | 0.8% ± 0.3%      | no           |
| Ser84  | 15% ± 1%    | 11% ± 3%         | yes          | Ser207 | 23% ± 4%    | 16% ± 5%         | yes          | Thr373 | 3.0% ± 1.0%   | 0.07% ± 0.08%    | yes          |
| Thr87  | 0.7% ± 0.2% | 8% ± 3%          | yes          | Ser208 | 0.5% ± 0.2% | 0.0% ± 0.0%      | yes          | Tyr386 | 0.6% ± 0.1%   | 0.6% ± 0.3%      | no           |
| Thr90  | 2.8% ± 0.7% | 8% ± 3%          | yes          | Thr209 | 0.4% ± 0.2% | 3% ± 3%          | no           | Lys387 | 0.1% ± 0.1%   | 1.5% ± 0.3%      | yes          |
| Lys92  | 2.5% ± 0.7% | 14% ± 5%         | yes          | Lys210 | 0.0% ± 0.0% | 33% ± 17%        | no           | Thr389 | 0.1% ± 0.0%   | 0.2% ± 0.1%      | no           |
| Tyr93  | 9% ± 1%     | 7% ± 3%          | no           | Lys213 | 55% ± 4%    | 54% ± 4%         | no           | Thr395 | 7% ± 1%       | 4% ± 2%          | yes          |
| Tyr94  | 1.1% ± 0.7% | 8% ± 5%          | yes          | Lys214 | 52% ± 2%    | 98% ± 4%         | yes          | Ser398 | 1.0% ± 0.2%   | 1.3% ± 0.5%      | no           |
| Thr96  | 2% ± 1%     | 34% ± 48%        | no           | Lys223 | 4% ± 2%     | 8% ± 4%          | no           | Tyr399 | 0.9% ± 0.3%   | 2.0% ± 0.4%      | yes          |
| Tyr100 | 13% ± 4%    | 0.0% ± 0.0%      | yes          | Thr228 | 0.0% ± 0.0% | 0.0% ± 0.0%      | no           | Tyr402 | 1.1% ± 0.9%   | 0.0% ± 0.0%      | yes          |
| Lys102 | 14% ± 4%    | 93% ± 9%         | yes          | Ser233 | 6% ± 3%     | 9% ± 8%          | no           | Ser403 | 11% ± 9%      | 3.8% ± 0.9%      | no           |
| Tyr104 | 14% ± 3%    | 0.0% ± 0.0%      | yes          | Ser234 | 21% ± 10%   | 17% ± 17%        | no           | Lys404 | 0.0% ± 0.0%   | 81% ± 9%         | no           |
| Tyr107 | 0.0% ± 0.0% | 1.7% ± 0.5%      | no           | Lys241 | 12% ± 2%    | 24% ± 5%         | yes          | Lys409 | 7% ± 4%       | 4% ± 2%          | no           |
| Thr112 | 0.7% ± 0.4% | 4.4% ± 0.8%      | yes          | Lys243 | 24% ± 3%    | 53% ± 6%         | yes          | Ser410 | 0.0% ± 0.0%   | 1.4% ± 0.5%      | no           |
| Thr115 | 19% ± 5%    | 5% ± 2%          | yes          | Thr247 | 8% ± 2%     | 0.0% ± 0.0%      | yes          | Thr417 | 9% ± 4%       | 15% ± 1%         | yes          |
| Ser117 | 6% ± 4%     | 6.1% ± 0.3%      | no           | Thr249 | 34% ± 12%   | 0.0% ± 0.0%      | yes          | Thr419 | 2.1% ± 0.7%   | 1% ± 1%          | no           |
| Lys120 | 2% ± 1%     | 10% ± 6%         | yes          | Thr251 | 26% ± 12%   | 10% ± 3%         | yes          | Ser421 | 20% ± 8%      | 2% ± 1%          | yes          |
| Thr121 | 0.3% ± 0.4% | 0.0% ± 0.0%      | yes          | Lys253 | 19% ± 2%    | 54% ± 11%        | yes          | His424 | 27% ± 4%      | 34% ± 3%         | yes          |
| Thr122 | 4.0% ± 0.6% | 24% ± 4%         | yes          | Thr255 | 0.0% ± 0.0% | 0.0% ± 0.0%      | no           | His428 | 3.3% ± 0.6%   | 16% ± 2%         | yes          |
| Ser125 | 5% ± 1%     | 2% ± 1%          | yes          | Ser262 | 2.0% ± 0.3% | 1.2% ± 0.2%      | yes          | His430 | 6% ± 3%       | 0.8% ± 0.2%      | yes          |
| Tyr127 | 6% ± 2%     | 7% ± 3%          | no           | Lys263 | 0.2% ± 0.2% | 9.3% ± 0.6%      | yes          | His431 | 1.8% ± 0.9%   | 0.4% ± 0.1%      | yes          |
| Ser133 | 5% ± 2%     | 7% ± 1%          | yes          | Ser271 | 1.1% ± 0.3% | 0.0% ± 0.0%      | yes          | Thr432 | 0.32% ± 0.07% | 1.4% ± 0.7%      | yes          |
| Thr137 | 1.5% ± 0.7% | 5% ± 1%          | yes          | His280 | 2.1% ± 0.6% | 7.5% ± 0.9%      | yes          | Lys434 | 0.0% ± 0.0%   | 10% ± 4%         | no           |
| Ser139 | 3% ± 2%     | 10% ± 5%         | yes          | Thr281 | 0.6% ± 0.1% | 0.5% ± 0.09%     | yes          | Ser435 | 22% ± 4%      | 5% ± 2%          | yes          |
| Thr142 | 4% ± 2%     | 9% ± 3%          | yes          | His283 | 0.4% ± 0.3% | 0.0% ± 0.0%      | yes          | His438 | 0.0% ± 0.0%   | 87% ± 10%        | no           |
| Lys148 | 25% ± 4%    | 19% ± 9%         | no           | Thr284 | 0.0% ± 0.0% | 11% ± 3%         | no           | Ser439 | 0.0% ± 0.0%   | 0.0% ± 0.0%      | no           |

\*A difference was considered significant if the p-value, calculated by performing an unpaired T-test, was less than 0.05 (corresponding to a 95% confidence level, n=5).



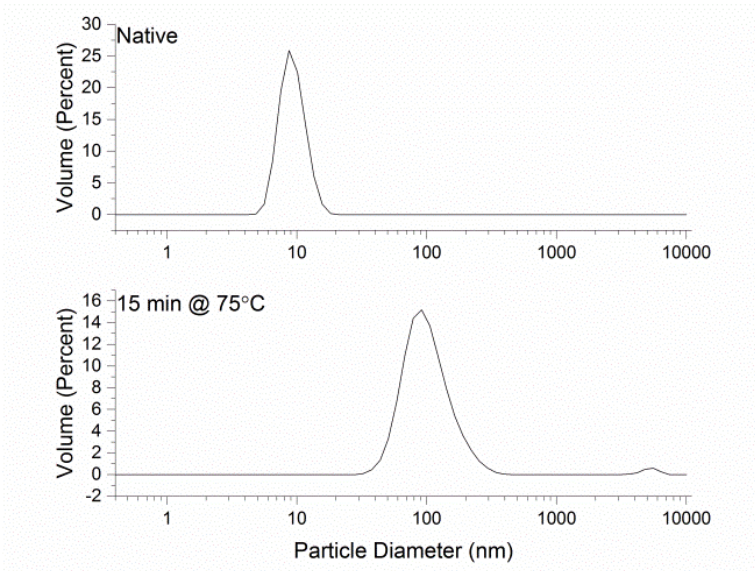

**Figure S5:** Dynamic light scattering data for IgG1 before (top) and after heating at 75 °C for 15 minutes (bottom). These data demonstrate that IgG1 aggregates upon heating.

**Table S3:** Zyggregator calculated Z-scores representing aggregation propensity of each residue for the light chain of IgG.

| Residue | Z-Score  |
|---------|----------|---------|----------|---------|----------|---------|----------|---------|----------|---------|----------|
| Asp1    | 0.740141 | Tyr37   | 1.51593  | Phe76   | 2.33023  | Lys112  | -0.50375 | Asp148  | -0.09626 | Leu184  | 2.2071   |
| Val2    | 1.26291  | Leu38   | 1.78082  | Thr77   | 2.12179  | Arg113  | -0.65845 | Ile149  | -0.23159 | Thr185  | 1.61285  |
| Leu3    | 0.910169 | Glu39   | 1.86017  | Leu78   | 1.71678  | Ala114  | -0.66578 | Asn150  | 1.37555  | Leu186  | 1.64172  |
| Met4    | 1.60023  | Trp40   | 1.13562  | Lys79   | 1.34919  | Asp115  | -2.2083  | Val151  | 1.81502  | Thr187  | 0.729396 |
| Thr5    | 0.474526 | Tyr41   | 0.373129 | Ile80   | 1.20088  | Ala116  | -1.39673 | Lys152  | 2.23183  | Lys188  | 1.0058   |
| Gln6    | 0.247509 | Leu42   | -0.99092 | Ser81   | -0.15091 | Ala117  | -0.56377 | Trp153  | 1.81502  | Asp189  | -0.34599 |
| Thr7    | 0.167981 | Gln43   | -0.39257 | Arg82   | -0.30561 | Pro118  | -0.3009  | Lys154  | 1.46642  | Glu190  | -1.13963 |
| Pro8    | 0.105319 | Lys44   | -1.03472 | Val83   | -0.84583 | Thr119  | -0.07178 | Ile155  | 1.15988  | Tyr191  | -1.56276 |
| Leu9    | -1.58422 | Pro45   | -1.57835 | Glu84   | -1.26264 | Val120  | 0.458246 | Asp156  | 0.619662 | Glu192  | -1.15603 |
| Ser10   | -1.14584 | Gly46   | -2.9424  | Ala85   | -1.18311 | Ser121  | -0.56341 | Gly157  | -0.41707 | Arg193  | -0.99721 |
| Leu11   | -1.55085 | Gln47   | -3.21713 | Glu86   | -0.37796 | Ile122  | -0.56341 | Ser158  | -0.39411 | His194  | 0.053732 |
| Pro12   | -0.34586 | Ser48   | -2.73104 | Asp87   | -0.37796 | Phe123  | -1.15612 | Glu159  | -0.83963 | Asn195  | 0.102814 |
| Val13   | -0.33434 | Pro49   | -1.55468 | Leu88   | 0.485283 | Pro124  | -1.65036 | Arg160  | -0.40207 | Ser196  | 1.32821  |
| Ser14   | -0.30547 | Lys50   | -1.57543 | Gly89   | 0.916388 | Pro125  | -2.15767 | Gln161  | -0.18657 | Tyr197  | 1.34731  |
| Leu15   | -0.51684 | Leu51   | -1.08765 | Val90   | 1.95408  | Ser126  | -2.35981 | Asn162  | -0.29474 | Thr198  | 1.29026  |
| Gly16   | 0.692517 | Leu52   | -1.49422 | Tyr91   | 2.56776  | Ser127  | -2.73513 | Gly163  | 0.025051 | Cys199  | 1.5074   |
| Asp17   | 0.385973 | Ile53   | 0.096855 | Tyr92   | 2.35639  | Glu128  | -1.04559 | Val164  | 0.739162 | Glu200  | 1.67698  |
| Gln18   | 0.643967 | Tyr54   | 0.503417 | Cys93   | 2.16869  | Gln129  | 0.238933 | Leu165  | 1.00592  | Ala201  | 1.10218  |
| Ala19   | 0.564439 | Lys55   | 0.799455 | Phe94   | 1.86215  | Leu130  | 0.329975 | Asn166  | 1.41076  | Thr202  | 0.914485 |
| Ser20   | 1.19148  | Val56   | 0.005816 | Gln95   | 1.67579  | Thr131  | 0.421018 | Ser167  | 1.34859  | His203  | 0.008706 |
| Ile21   | 0.823887 | Ser57   | 0.202672 | Gly96   | 1.6264   | Ser132  | 0.853155 | Trp168  | 0.91021  | Lys204  | 1.10873  |
| Ser22   | 0.955726 | Asn58   | -0.15326 | Ser97   | -0.18851 | Gly133  | 0.984994 | Thr169  | 0.671861 | Thr205  | 1.1839   |
| Cys23   | 1.0309   | Arg59   | 0.344344 | His98   | -0.56383 | Gly134  | 1.21201  | Asp170  | 0.859384 | Ser206  | -0.69334 |
| Arg24   | 0.89906  | Phe60   | 0.344344 | Val99   | -0.02698 | Ala135  | 1.11354  | Gln171  | 0.265126 | Thr207  | -0.41722 |
| Ser25   | 0.996998 | Ser61   | -0.75249 | Pro100  | 0.524527 | Ser136  | 1.83162  | Asp172  | -0.40401 | Ser208  | 0.483583 |
| Ser26   | 1.25499  | Gly62   | -0.91148 | Leu101  | 0.61557  | Val137  | 2.38313  | Ser173  | -0.80902 | Pro209  | -0.32799 |
| Gln27   | 0.843454 | Val63   | -0.91148 | Thr102  | 0.370822 | Val138  | 2.18392  | Lys174  | -0.24519 | Ile210  | -0.16893 |
| Tyr28   | 1.16405  | Pro64   | -0.91148 | Phe103  | -0.03238 | Cys139  | 2.44696  | Asp175  | 0.242585 | Val211  | -0.1191  |
| Ile29   | 1.35175  | Ser68   | 0.532936 | Gly104  | 1.65716  | Phe140  | 2.44713  | Ser176  | 0.840874 | Lys212  | -0.11893 |
| Val30   | 1.35192  | Gly69   | 0.504061 | Ala105  | 1.35877  | Leu141  | 2.59544  | Thr177  | 0.983064 | Ser213  | 0.639186 |
| His31   | 1.5748   | Ser70   | 1.30921  | Gly106  | 1.03328  | Asn142  | 2.45713  | Tyr178  | 1.57732  | Phe214  | 0.381364 |
| Ser32   | 1.21904  | Gly71   | 1.25938  | Thr107  | 0.510588 | Asn143  | 0.454523 | Ser179  | 1.54845  | Asn215  | -0.43249 |
| Asn33   | 1.36606  | Ser72   | 0.91286  | Lys108  | 0.67754  | Phe144  | -0.59459 | Met180  | 1.76577  | Arg216  | 0.692154 |
| Gly34   | 1.22775  | Gly73   | 1.27667  | Leu109  | 0.346151 | Tyr145  | -0.83294 | Ser181  | 1.62798  | Asn217  | 0.496002 |
| Asn35   | 1.5131   | Thr74   | 2.30885  | Glu110  | -0.27131 | Pro146  | -0.38742 | Ser182  | 1.92883  | Glu218  | 0.09521  |
| Thr36   | 1.00579  | Asp75   | 2.29733  | Ile111  | -0.75149 | Lys147  | 0.052048 | Thr183  | 1.94428  | Cys219  | 0.031949 |

**Table S4:** Zyggregator calculated Z-scores representing aggregation propensity of each residue for the heavy chain of IgG.

| Residue | Z-Score  |
|---------|----------|---------|----------|---------|----------|---------|----------|---------|----------|---------|----------|---------|----------|
| Gln1    | 0.939101 | Lys64   | -0.08939 | Tyr127  | -1.50868 | Ser190  | 0.735901 | Lys253  | 0.616636 | Cys316  | 0.432904 | Asn379  | 0.021251 |
| Val2    | 0.599465 | Ser65   | -0.02532 | Pro128  | -1.32098 | Ser191  | -0.95364 | Val254  | 0.843653 | Arg317  | 0.940215 | Gly380  | -0.56424 |
| Gln3    | 0.091299 | Arg66   | 0.307851 | Leu129  | -1.22994 | Thr192  | -1.26018 | Thr255  | 0.745184 | Val318  | 0.410191 | Gln381  | -1.19148 |
| Leu4    | 0.229224 | Ile67   | 0.633337 | Ala130  | -1.53648 | Trp193  | -0.48297 | Cys256  | 2.33625  | Asn319  | 0.553884 | Pro382  | -1.51392 |
| Lys5    | 0.452106 | Ser68   | 0.633337 | Pro131  | -2.15529 | Pro194  | -0.07795 | Val257  | 2.3963   | Ser320  | 0.290652 | Ala383  | -1.15816 |
| Glu6    | -1.13896 | Ile69   | 0.286819 | Gly132  | -0.94593 | Ser195  | 0.22859  | Val258  | 2.34775  | Ala321  | -0.46746 | Glu384  | -1.84346 |
| Ser7    | -1.35555 | Thr70   | 0.813407 | Ser133  | -1.1573  | Glu196  | 0.22859  | Val259  | 1.94273  | Ala322  | -0.84918 | Asn385  | -1.71145 |
| Gly8    | -1.35555 | Lys71   | 0.367716 | Ala134  | -0.67711 | Thr197  | 0.43636  | Asp260  | 0.818089 | Phe323  | -2.13387 | Tyr386  | -0.02191 |
| Pro9    | -0.64244 | Asp72   | -0.47831 | Ala135  | 0.44859  | Val198  | 1.72106  | Ile261  | 0.352722 | Pro324  | -2.06358 | Lys387  | -0.07857 |
| Gly10   | -0.2103  | Asn73   | -0.73631 | Gln136  | 0.357547 | Thr199  | 2.0276   | Ser262  | -0.11264 | Ala325  | -2.68341 | Asn388  | -0.85579 |
| Leu11   | -1.49483 | Ser74   | -1.27316 | Thr137  | 0.499737 | Cys200  | 2.64744  | Lys263  | -1.70371 | Pro326  | -2.8271  | Thr389  | -0.59797 |
| Val12   | -1.58587 | Lys75   | -0.37236 | Asp138  | 1.06915  | Asn201  | 2.2243   | Asp264  | -2.2399  | Ile327  | -3.06464 | Gln390  | -0.81171 |
| Ala13   | -0.43319 | Ser76   | 0.241315 | Ser139  | 1.54934  | Val202  | 0.445535 | Asp265  | -2.37904 | Glu328  | -1.33442 | Pro391  | -0.56397 |
| Pro14   | -0.52423 | Gln77   | 0.508366 | Met140  | 1.76071  | Ala203  | 0.153044 | Pro266  | -2.25911 | Lys329  | -1.44694 | Ile392  | -0.15913 |
| Ser15   | -0.52423 | Val78   | 0.2895   | Val141  | 1.44673  | His204  | -0.75273 | Glu267  | -1.3977  | Thr330  | -0.56898 | Met393  | -0.72297 |
| Gln16   | -0.579   | Phe79   | 1.02595  | Thr142  | 2.32364  | Pro205  | -0.75291 | Val268  | -1.42658 | Ile331  | -0.42196 | Asp394  | -0.31239 |
| Ser17   | -0.05814 | Leu80   | 1.02612  | Leu143  | 2.21547  | Ala206  | -0.65444 | Gln269  | -0.75744 | Ser332  | -0.32121 | Thr395  | 1.15983  |
| Leu18   | 1.6314   | Lys81   | 1.15796  | Gly144  | 2.37982  | Ser207  | -1.17352 | Phe270  | 0.981934 | Lys333  | 0.176393 | Asp396  | 1.25777  |
| Ser19   | 2.34948  | Met82   | 0.930944 | Cys145  | 1.66672  | Ser208  | -1.03655 | Ser271  | 1.98349  | Thr334  | -0.75504 | Gly397  | 1.57043  |
| Ile20   | 2.88634  | Asn83   | 0.156558 | Leu146  | 1.35275  | Thr209  | 0.276846 | Trp272  | 1.51812  | Lys335  | -2.29756 | Ser398  | 1.8481   |
| Thr21   | 3.19288  | Ser84   | 0.482044 | Val147  | 1.62915  | Lys210  | -0.05454 | Phe273  | 1.05167  | Gly336  | -2.70412 | Tyr399  | 1.98672  |
| Cys22   | 3.11335  | Leu85   | 0.729784 | Lys148  | 1.99296  | Val211  | -0.46111 | Val274  | 0.715668 | Arg337  | -2.37273 | Phe400  | 2.14554  |
| Thr23   | 2.76493  | Gln86   | 0.616469 | Gly149  | 0.178047 | Asp212  | -0.20311 | Asp275  | 0.83552  | Pro338  | -4.06227 | Val401  | 1.64794  |
| Val24   | 2.96179  | Thr87   | 0.833613 | Tyr150  | -0.40879 | Lys213  | -0.48928 | Asp276  | 0.819449 | Lys339  | -3.97524 | Tyr402  | 1.72746  |
| Ser25   | 2.55677  | Asp88   | 0.75844  | Phe151  | -1.99986 | Lys214  | -1.36724 | Val277  | 0.534173 | Ala340  | -3.75974 | Ser403  | 1.62347  |
| Gly26   | 1.91822  | Asp89   | 0.272351 | Pro152  | -1.28675 | Ile215  | -2.2002  | Glu278  | 0.632643 | Pro341  | -2.6897  | Lys404  | 1.47517  |
| Phe27   | 1.59273  | Thr90   | 0.760123 | Glu153  | -0.97278 | Val216  | -2.2002  | Val279  | 0.528595 | Gln342  | -1.00016 | Leu405  | 1.22448  |
| Ser28   | 1.18953  | Ala91   | 0.711041 | Pro154  | -0.5827  | Pro217  | -1.07555 | His280  | 0.669296 | Val343  | -0.3356  | Asn406  | 0.461985 |
| Leu29   | 1.54546  | Lys92   | 1.58795  | Val155  | -0.63254 | Arg218  | -0.57795 | Thr281  | 0.767765 | Tyr344  | -1.35726 | Val407  | 0.274289 |
| Leu30   | 1.54546  | Tyr93   | 2.15178  | Thr156  | 1.1623   | Asp219  | -0.11786 | Ala282  | 0.70377  | Thr345  | -1.54495 | Gln408  | 0.681024 |
| Gly31   | 1.39716  | Tyr94   | 1.22035  | Val157  | 1.66978  | Cys220  | -0.83097 | His283  | -0.8873  | Ile346  | -2.32225 | Lys409  | 1.11181  |
| Tyr32   | 1.39733  | Cys95   | 1.22035  | Thr158  | 2.95431  | Gly221  | -0.45558 | Thr284  | -1.39559 | Pro347  | -3.22305 | Ser410  | 0.164859 |
| Gly33   | 1.82812  | Thr96   | 0.342389 | Trp159  | 2.55111  | Cys222  | 0.788921 | Gln285  | -2.30792 | Pro348  | -3.8986  | Asn411  | -0.21686 |
| Val34   | 2.05513  | Arg97   | 0.342389 | Asn160  | 2.14609  | Lys223  | 1.01804  | Pro286  | -2.36466 | Pro349  | -4.43545 | Trp412  | 0.006023 |
| Asn35   | 1.43768  | Ala98   | 0.077499 | Ser161  | 1.47961  | Pro224  | 1.20574  | Arg287  | -2.29068 | Lys350  | -4.36356 | Glu413  | 0.412758 |
| Trp36   | 1.1376   | Pro99   | -1.23484 | Gly162  | 1.0746   | Cys225  | 1.70741  | Glu288  | -2.24085 | Glu351  | -3.1542  | Ala414  | 0.817772 |
| Val37   | -0.23797 | Tyr100  | -1.95939 | Ser163  | 0.564284 | Ile226  | 1.29587  | Glu289  | -1.92114 | Gln352  | -2.27624 | Gly415  | 1.27245  |
| Arg38   | -1.82904 | Gly101  | -1.07704 | Leu164  | 0.84285  | Cys227  | 0.417904 | Gln290  | -0.82431 | Met353  | -1.15054 | Asn416  | 1.16715  |
| Gln39   | -1.73817 | Lys102  | -0.54702 | Ser165  | 1.14939  | Thr228  | 1.19512  | Phe291  | 0.107118 | Ala354  | -1.15054 | Thr417  | 2.39254  |
| Pro40   | -2.38032 | Gln103  | 0.850028 | Ser166  | 1.04023  | Val229  | 0.595885 | Asn292  | 1.06928  | Lys355  | -0.33668 | Phe418  | 2.46772  |
| Pro41   | -2.59582 | Tyr104  | 0.850028 | Gly167  | 1.44524  | Pro230  | 0.525587 | Ser293  | 1.05017  | Asp356  | 0.422319 | Thr419  | 2.68322  |
| Gly42   | -1.98988 | Phe105  | 1.2693   | Val168  | 1.63287  | Glu231  | -0.38019 | Thr294  | 1.18201  | Lys357  | 0.359657 | Cys420  | 2.57488  |
| Gln43   | -2.36535 | Ala106  | 1.7669   | His169  | 0.348346 | Val232  | -0.47866 | Phe295  | 1.03371  | Val358  | 0.839844 | Ser421  | 2.15174  |
| Gly44   | -0.75821 | Tyr107  | 1.7669   | Thr170  | 0.273173 | Ser233  | -0.51805 | Arg296  | 1.03354  | Ser359  | 1.96449  | Val422  | 1.18958  |
| Leu45   | 0.605844 | Trp108  | 1.68971  | Phe171  | 0.488675 | Ser234  | 1.39986  | Ser297  | 0.338529 | Leu360  | 2.0778   | Leu423  | 0.687914 |
| Glu46   | 0.656991 | Gly109  | 1.63987  | Pro172  | 0.261658 | Val235  | 2.36202  | Val298  | -0.17465 | Thr361  | 2.36697  | His424  | 0.424752 |
| Trp47   | 0.879873 | Gln110  | 1.60688  | Ala173  | 0.14794  | Phe236  | 0.770952 | Ser299  | -1.72633 | Cys362  | 2.65313  | Glu425  | 0.40663  |
| Leu48   | 0.859129 | Gly111  | 1.55749  | Val174  | -0.25707 | Ile237  | -0.51357 | Glu300  | -0.75423 | Met363  | 2.05485  | Gly426  | 0.100259 |
| Met49   | 1.10222  | Thr112  | 1.45219  | Leu175  | -0.87075 | Phe238  | -0.92014 | Leu301  | -0.61204 | Ile364  | 2.43017  | Leu427  | 0.00261  |
| Gly50   | 1.70057  | Leu113  | 1.85539  | Gln176  | 0.493306 | Pro239  | -2.51121 | Pro302  | -0.74901 | Thr365  | 2.29231  | His428  | 0.00261  |
| Ile51   | 1.03144  | Val114  | 1.98723  | Ser177  | 0.924412 | Pro240  | -3.37262 | Ile303  | -1.06854 | Asp366  | 0.102004 | Asn429  | 0.914934 |
| Trp52   | 1.04295  | Thr115  | 1.82101  | Asp178  | 1.02288  | Lys241  | -3.78943 | Met304  | -0.72006 | Phe367  | -0.35598 | His430  | 0.316581 |
| Gly53   | 0.90076  | Val116  | 1.34083  | Leu179  | 1.02288  | Pro242  | -4.12544 | His305  | -0.10157 | Phe368  | -0.96431 | His431  | -0.16951 |
| Asp54   | 1.40243  | Ser117  | 0.854736 | Tyr180  | 1.15472  | Lys243  | -2.94908 | Gln306  | 1.26248  | Pro369  | -1.11133 | Thr432  | 0.036309 |
| Gly55   | 0.985612 | Ala118  | 0.953205 | Thr181  | 1.15472  | Asp244  | -1.25954 | Asp307  | 1.00466  | Glu370  | -0.10803 | Glu433  | 0.115664 |
| Ser56   | 1.01893  | Ala119  | 0.953205 | Leu182  | 1.31354  | Val245  | -0.15552 | Trp308  | 0.95351  | Asp371  | -0.25634 | Lys434  | 0.133785 |
| Thr57   | 1.11576  | Lys120  | -0.63787 | Ser183  | 1.54056  | Leu246  | 1.53402  | Leu309  | 0.565069 | Ile372  | -0.77903 | Ser435  | 0.133785 |
| Asp58   | 1.27458  | Thr121  | -1.92239 | Ser184  | 1.58964  | Thr247  | 2.02011  | Asn310  | 0.189598 | Thr373  | 1.01581  | Leu436  | -0.27123 |
| Tyr59   | 1.10836  | Thr122  | -1.84722 | Ser185  | 1.49117  | Ile248  | 2.58395  | Gly311  | 0.615574 | Val374  | 1.64305  | Ser437  | -1.04844 |
| Asn60   | 1.18789  | Pro123  | -1.4655  | Val186  | -0.06058 | Thr249  | 0.992878 | Lys312  | -0.3013  | Glu375  | 2.31218  | His438  | -0.55084 |
| Ser61   | 0.188617 | Pro124  | -0.703   | Thr187  | -0.06058 | Leu250  | 0.694484 | Glu313  | 0.337255 | Trp376  | 2.05436  | Ser439  | -0.55092 |
| Ala62   | 0.535135 | Ser125  | -2.39254 | Val188  | -0.06058 | Thr251  | 0.596015 | Phe314  | -0.18933 | Gln377  | 1.67632  | Pro440  | -0.86521 |
| Leu63   | -0.34721 | Val126  | -2.71803 | Pro189  | 0.532133 | Pro252  | 0.491264 | Lys315  | 0.026169 | Trp378  | 1.23793  | Gly441  | -0.89465 |

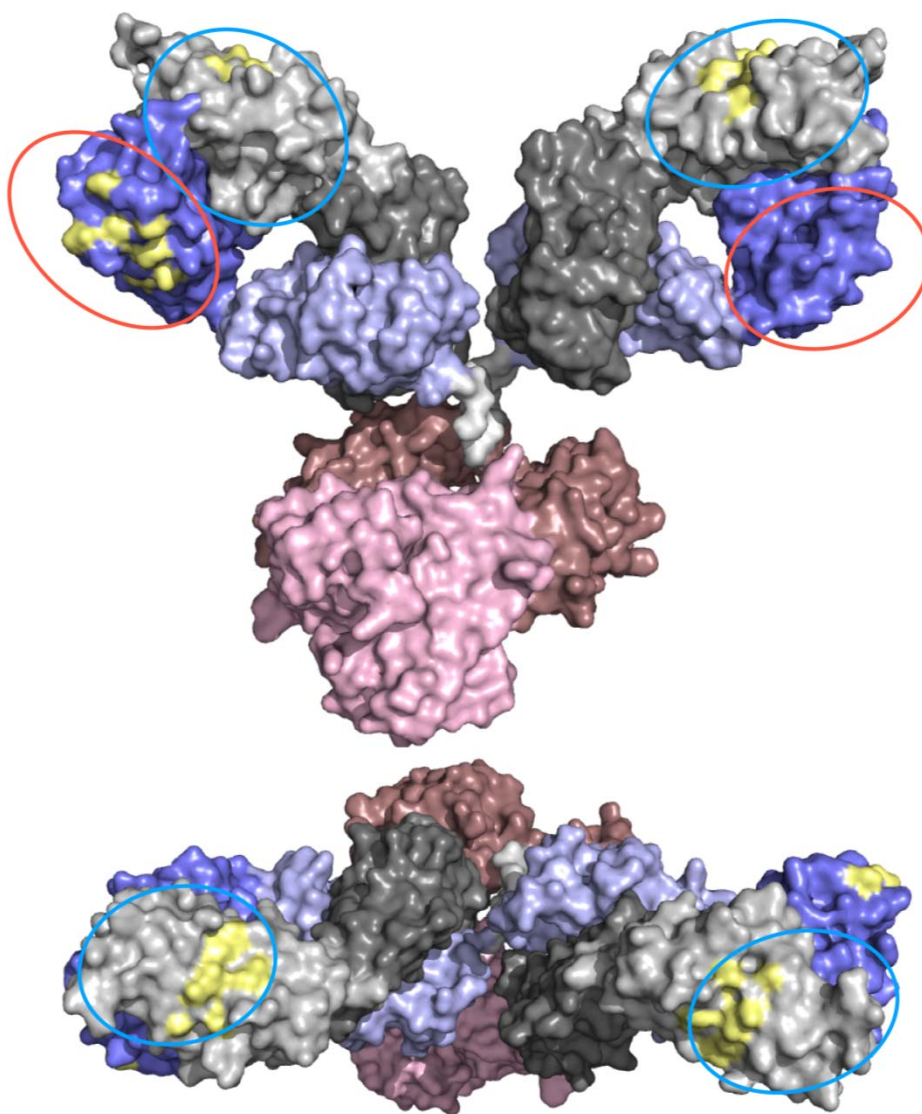

**Figure S6** Structure of IgG1 with each domain represented in a different color: V<sub>L</sub> (light grey), V<sub>C</sub> (dark grey), V<sub>H</sub> (dark blue), C<sub>H</sub><sup>1</sup> (light blue), C<sub>H</sub><sup>2</sup> (dark purple), and C<sub>H</sub><sup>3</sup> (pink). The potential interfacial residues are circled and represented in yellow.

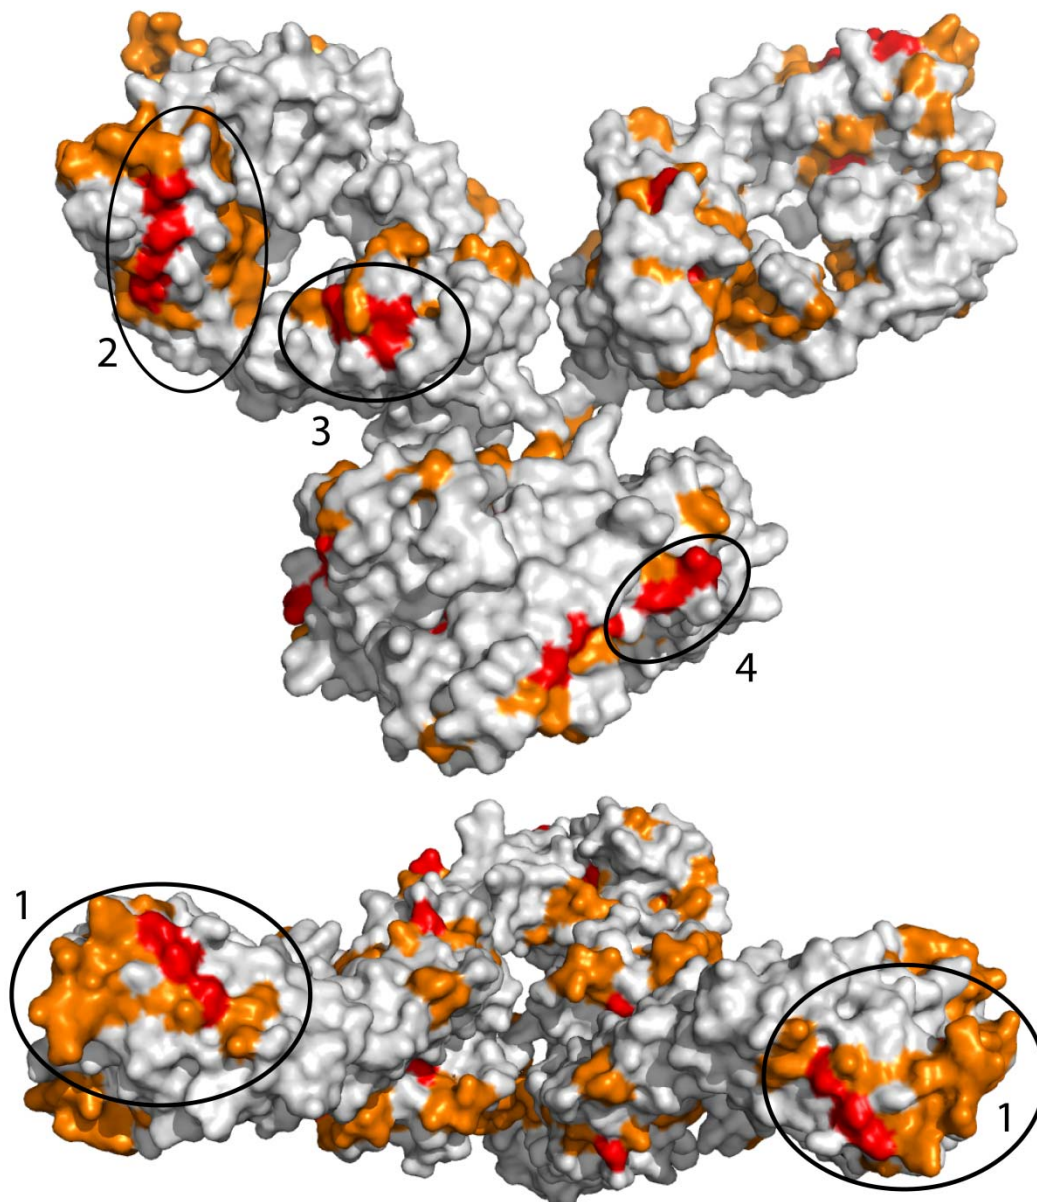

**Figure S7:** Propensities for aggregation from Zyggregator as indicated by Z-scores. Z-Score > 2 (red) Z-score > 1 (orange). A higher score denotes an increased likelihood of aggregation. Circled sites highlight the regions where there is a clustering of residues with a high calculated aggregation propensity. Labeled sites 1 and 2 are the covalent labeling indicated aggregation sites on the V<sub>L</sub> domain and the V<sub>H</sub> domain, respectively.



**Table S5:** Modification percentages for individual residues of HGH before and after heating at 65 °C for 24 hours.

| HGH    | Native        | 24 hour       | Significant* |
|--------|---------------|---------------|--------------|
| N-Term | 5% ± 4%       | 9% ± 5%       | no           |
| Thr4   | 12% ± 3%      | 10% ± 2%      | no           |
| Ser8   | 5% ± 1%       | 3.6% ± 0.8%   | no           |
| His19  | 39.9% ± 0.4%  | 37.7% ± 0.7%  | yes          |
| His22  | 5% ± 2%       | 6% ± 1%       | no           |
| Thr28  | 0.73% ± 0.01% | 0.66% ± 0.03% | yes          |
| Tyr29  | 30% ± 7%      | 33% ± 8%      | no           |
| Tyr36  | 6.3% ± 0.1%   | 5.9% ± 0.3%   | no           |
| Lys39  | 0.91% ± 0.07% | 0.93% ± 0.07% | no           |
| Lys42  | 6.1% ± 0.3%   | 5.2% ± 0.7%   | no           |
| Tyr43  | 8.0% ± 0.3%   | 8% ± 1%       | no           |
| Ser44  | 1.2% ± 0.2%   | 1.14% ± 0.06% | no           |
| Thr51  | 3.0% ± 0.7%   | 3.7% ± 0.7%   | no           |
| Ser56  | 12% ± 2%      | 14% ± 2%      | no           |
| Ser58  | 15% ± 2%      | 16% ± 2%      | no           |
| Thr61  | 2.7% ± 0.5%   | 1.8% ± 0.2%   | yes          |
| Thr68  | 71% ± 14%     | 72% ± 9%      | no           |
| Ser86  | 15% ± 2%      | 12% ± 1%      | no           |
| Ser96  | 17% ± 4%      | 14% ± 1%      | no           |
| Ser101 | 15% ± 2%      | 13% ± 1%      | no           |
| Tyr104 | 0.8% ± 0.4%   | 0.5% ± 0.1%   | no           |
| Ser107 | 1.5% ± 0.5%   | 0.9% ± 0.2%   | no           |
| Ser109 | 0.8% ± 0.3%   | 0.6% ± 0.1%   | no           |
| Tyr112 | 0.8% ± 0.2%   | 0.5% ± 0.1%   | no           |
| Lys116 | 1.6% ± 0.7%   | 0.9% ± 0.2%   | no           |
| Thr124 | 1.2% ± 0.3%   | 1.0% ± 0.1%   | no           |
| Ser133 | 16% ± 1%      | 14% ± 3%      | no           |
| Thr136 | 42% ± 2%      | 60% ± 6%      | yes          |
| Lys141 | 42% ± 5%      | 40% ± 7%      | no           |
| Thr143 | 80% ± 6%      | 84% ± 4%      | no           |
| Ser145 | 1.6% ± 0.5%   | 1.4% ± 0.3%   | no           |
| Lys146 | 0.83% ± 0.02% | 0.8% ± 0.2%   | no           |
| Thr149 | 7% ± 4%       | 9% ± 4%       | no           |
| Ser151 | 2.2% ± 0.3%   | 2.3% ± 0.3%   | no           |
| His152 | 2% ± 1%       | 3% ± 1%       | no           |
| Lys159 | 0.37% ± 0.05% | 0.8% ± 0.2%   | yes          |
| Tyr165 | 64% ± 2%      | 45% ± 2%      | yes          |
| Lys169 | 10% ± 1%      | 14% ± 3%      | no           |
| Lys173 | 0.9% ± 0.4%   | 1.3% ± 0.3%   | no           |
| Thr176 | 0.14% ± 0.01% | 0.14% ± 0.01% | no           |
| Ser185 | 38% ± 8%      | 51% ± 4%      | no           |

\*A difference was considered significant if the p-value, calculated by performing an unpaired T-test, was less than 0.05 (corresponding to a 95% confidence level, n=3).

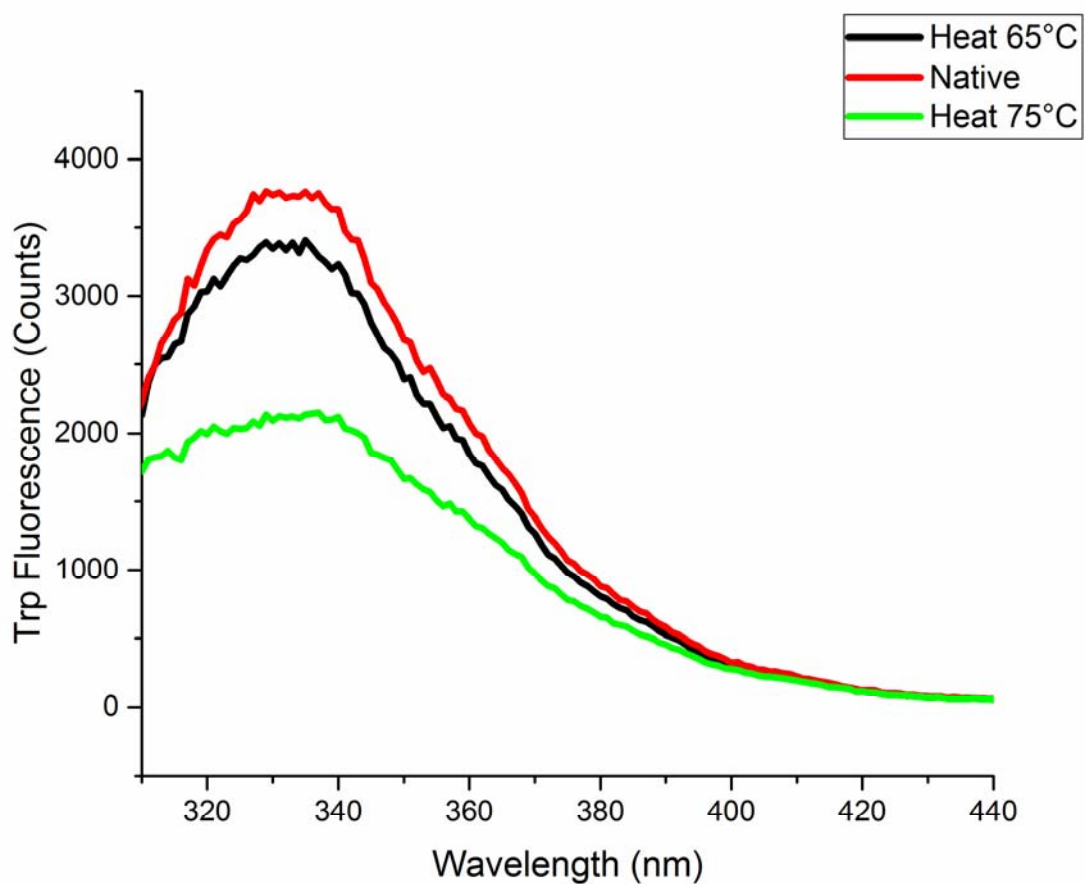

**Figure S8:** Tryptophan fluorescence of HGH under normal (red), heated to 65 °C (black), and heated to 75 °C (green) conditions. The fluorescence spectrum at 75 °C is included as a positive control to demonstrate that fluorescence can reveal structural perturbations for HGH.

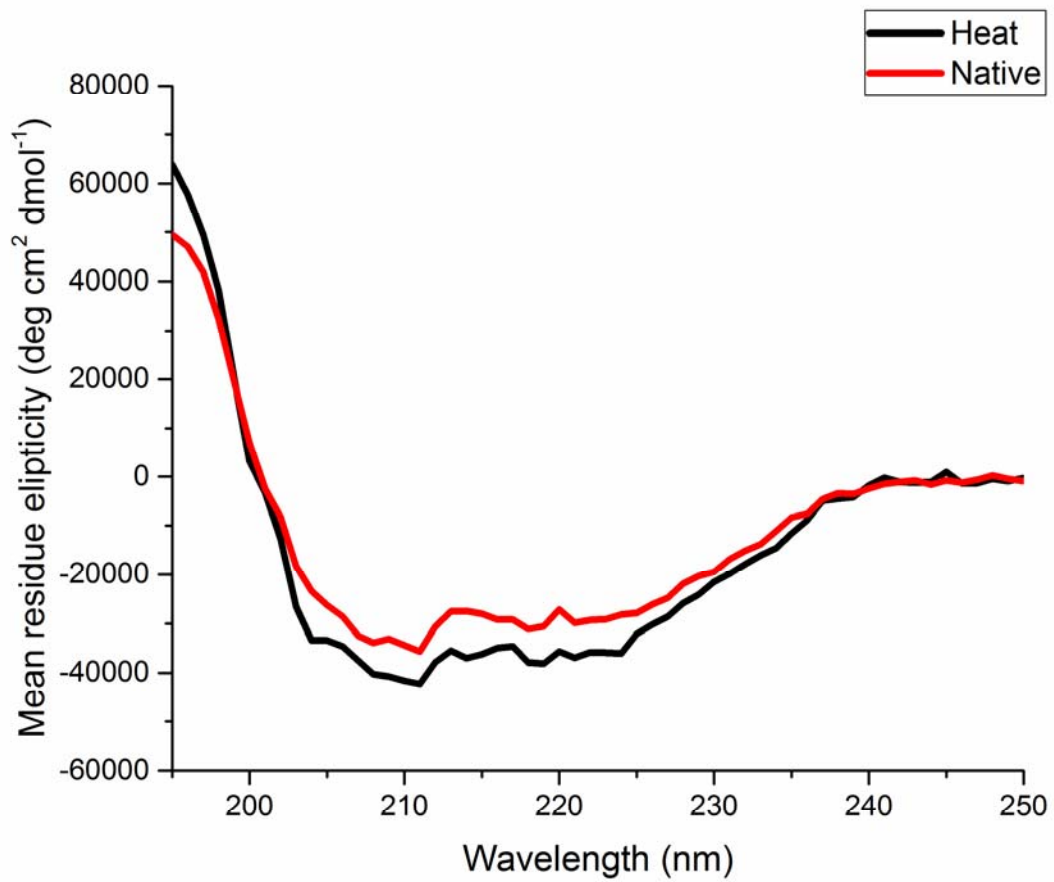

**Figure S9:** Circular dichroism of HGH under normal (red) and heated (65 °C, black) conditions. CD does not reveal any significant changes in HGH structure.



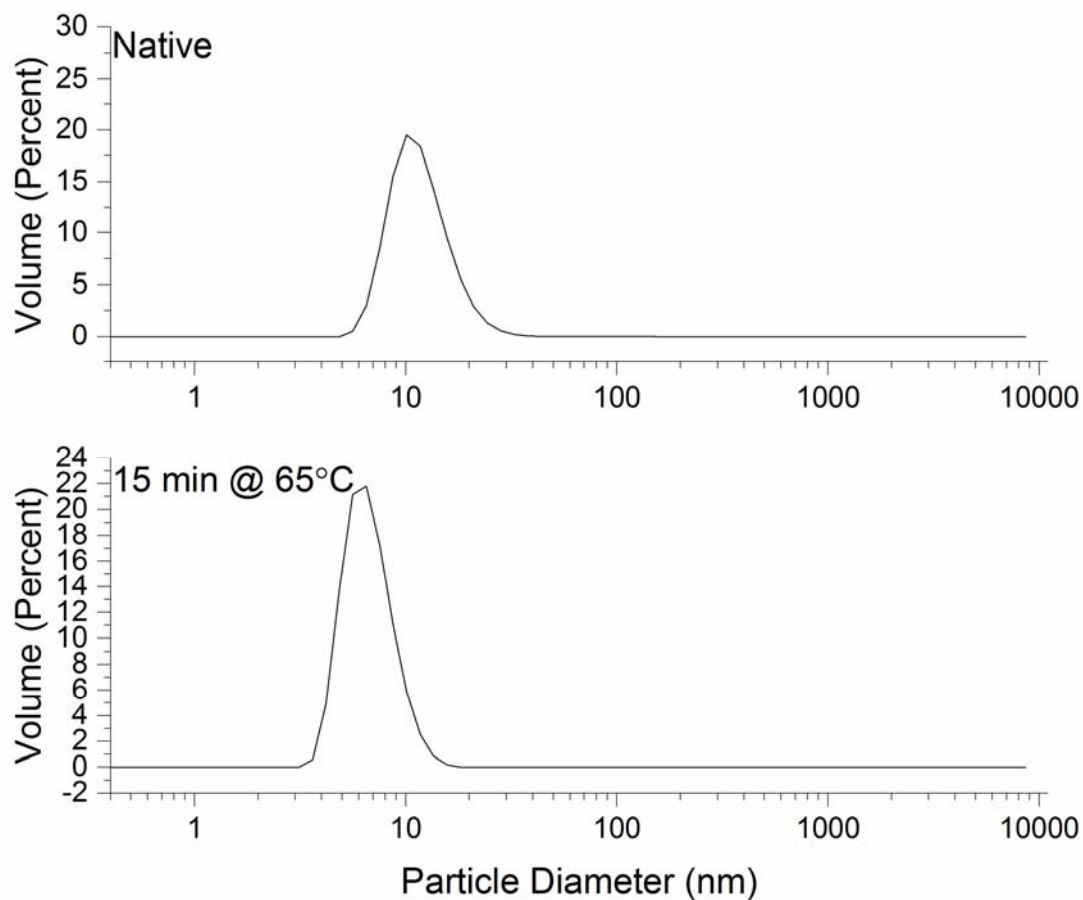

**Figure S10:** Dynamic light scattering data for HGH before (top) and after heating at 65 °C for 24 h (bottom). These data demonstrate that HGH undergoes some degree of compaction upon heating.
